# Supplementary material
Source: ML conference proceedings conference paper supplement (https://openreview.net/forum?id=YKvBiRWdQC)

**DR****PLR****PAIRED****ACCEL****Middle**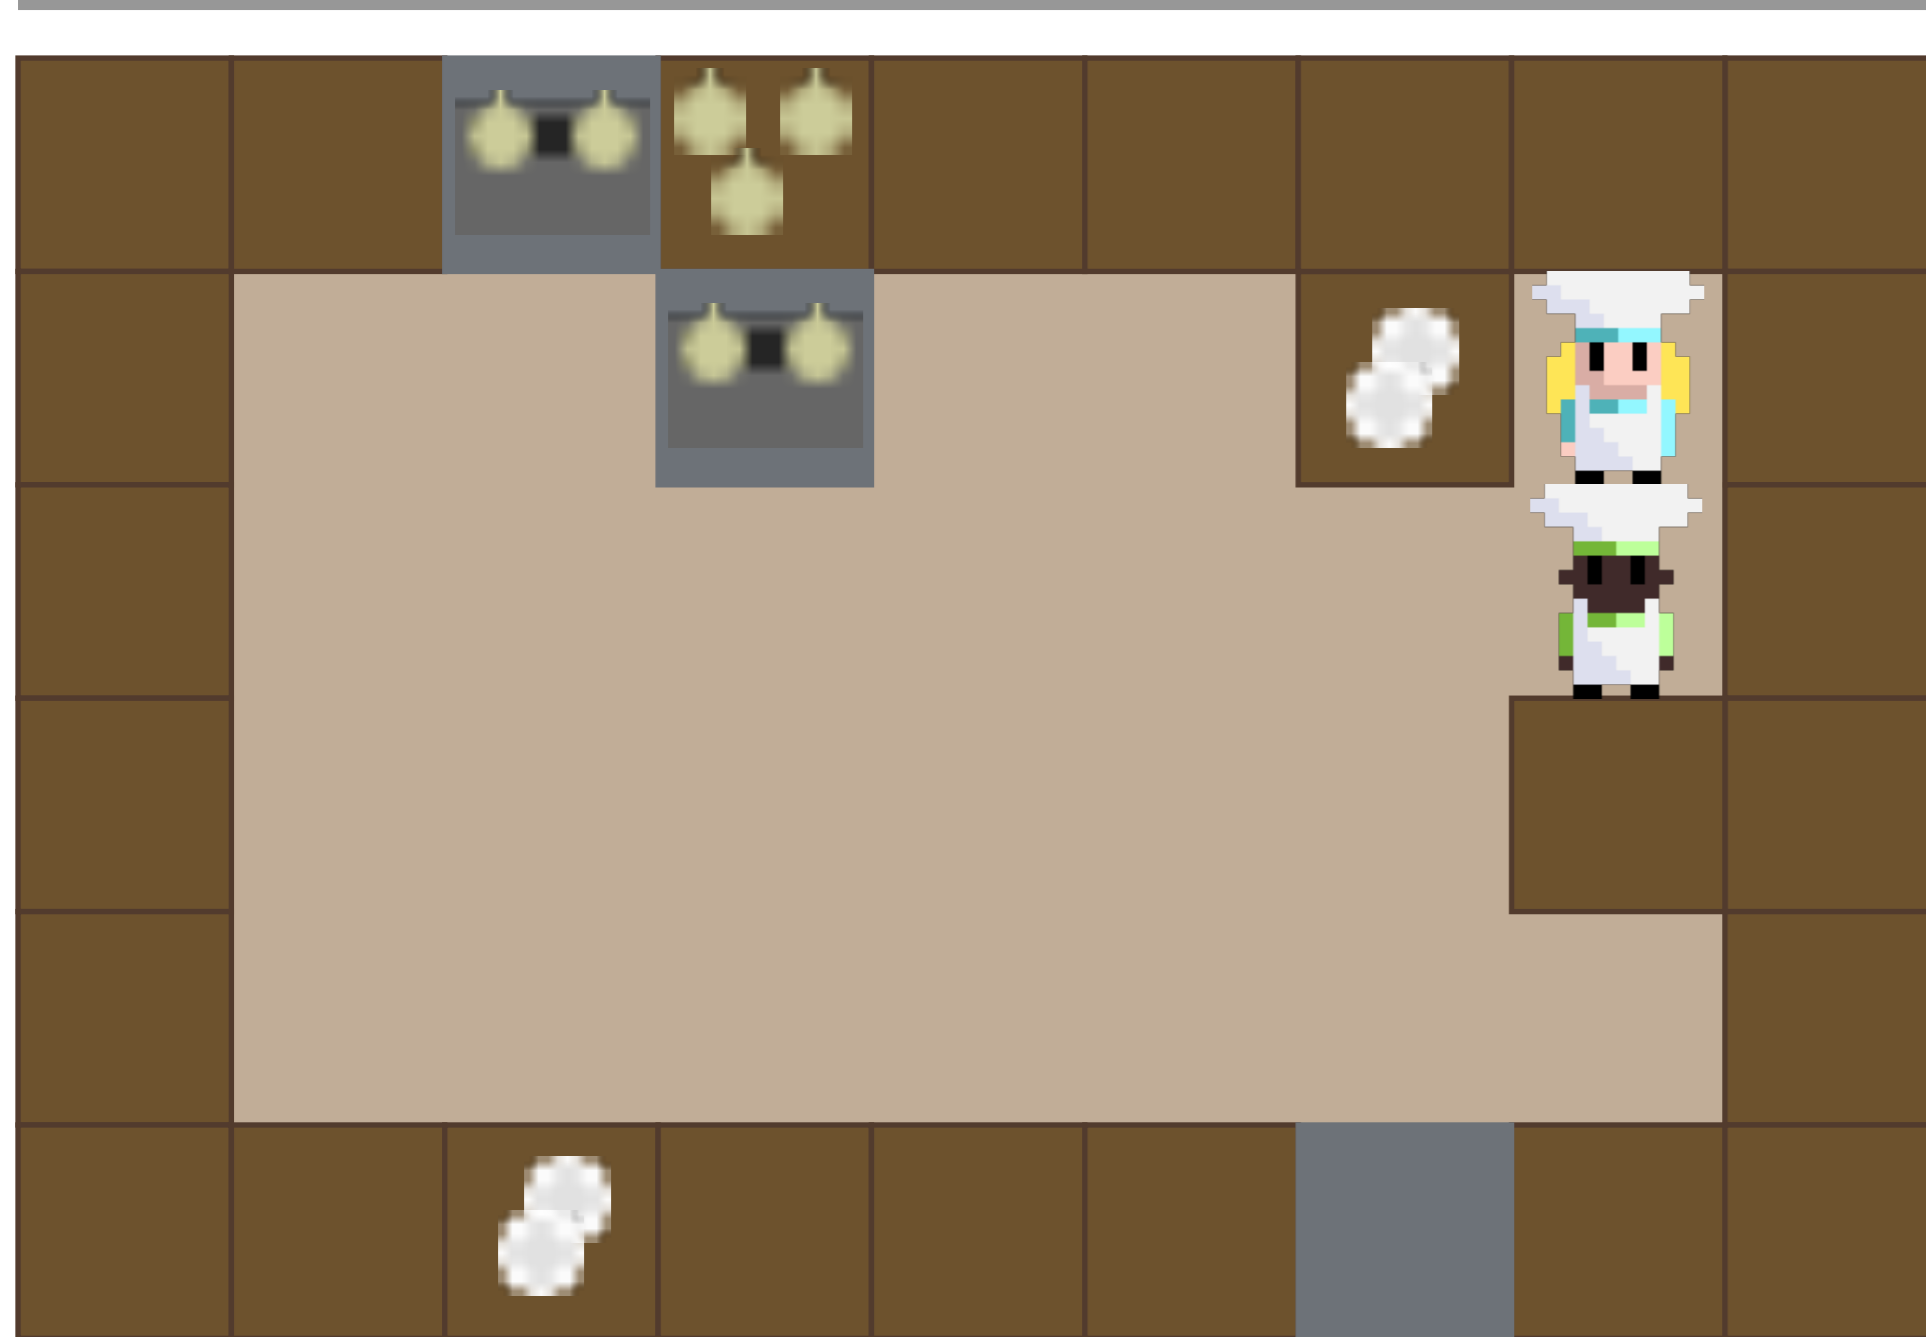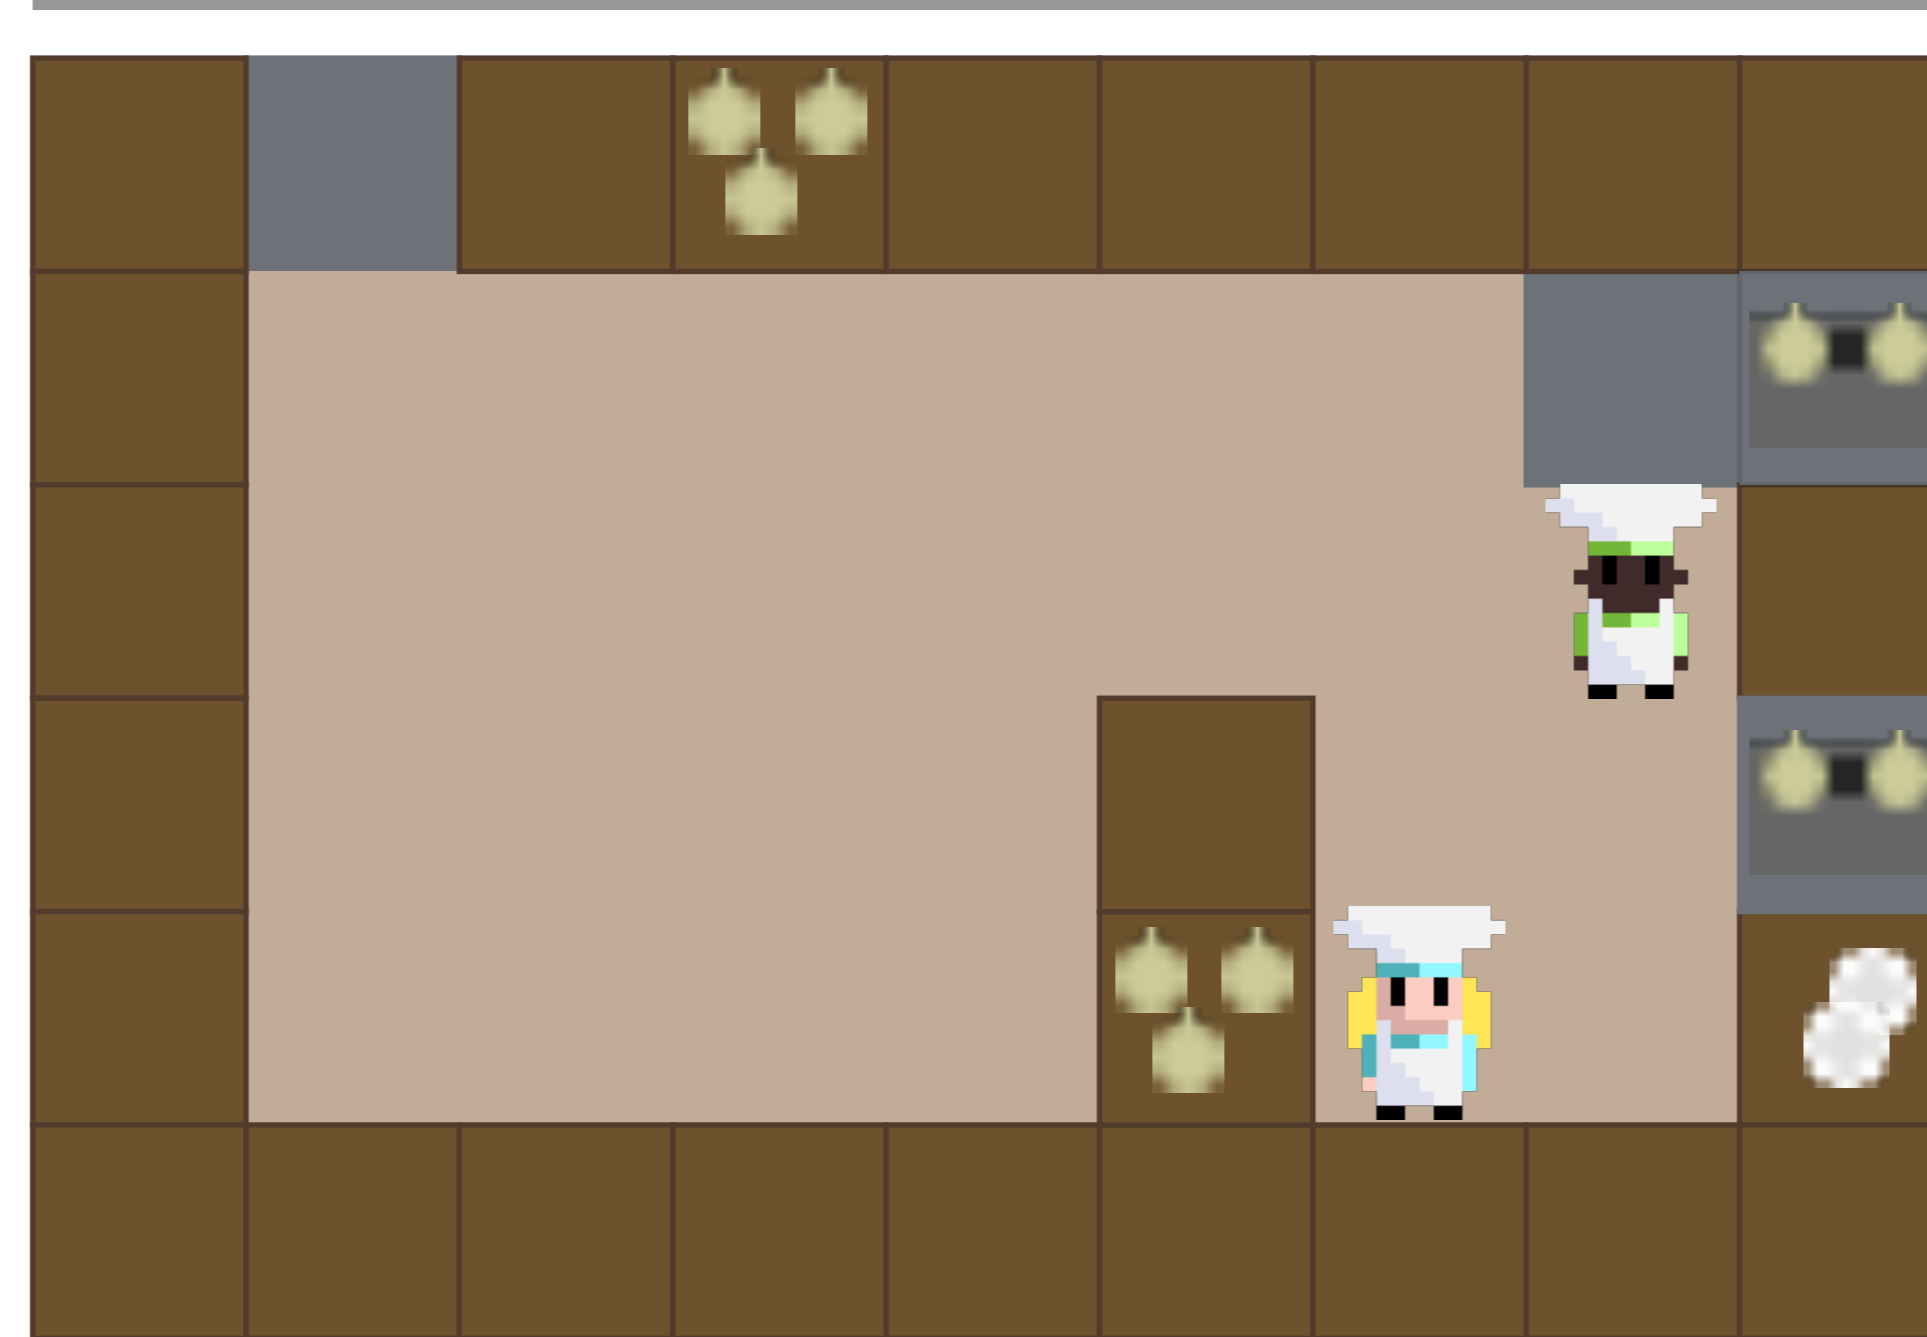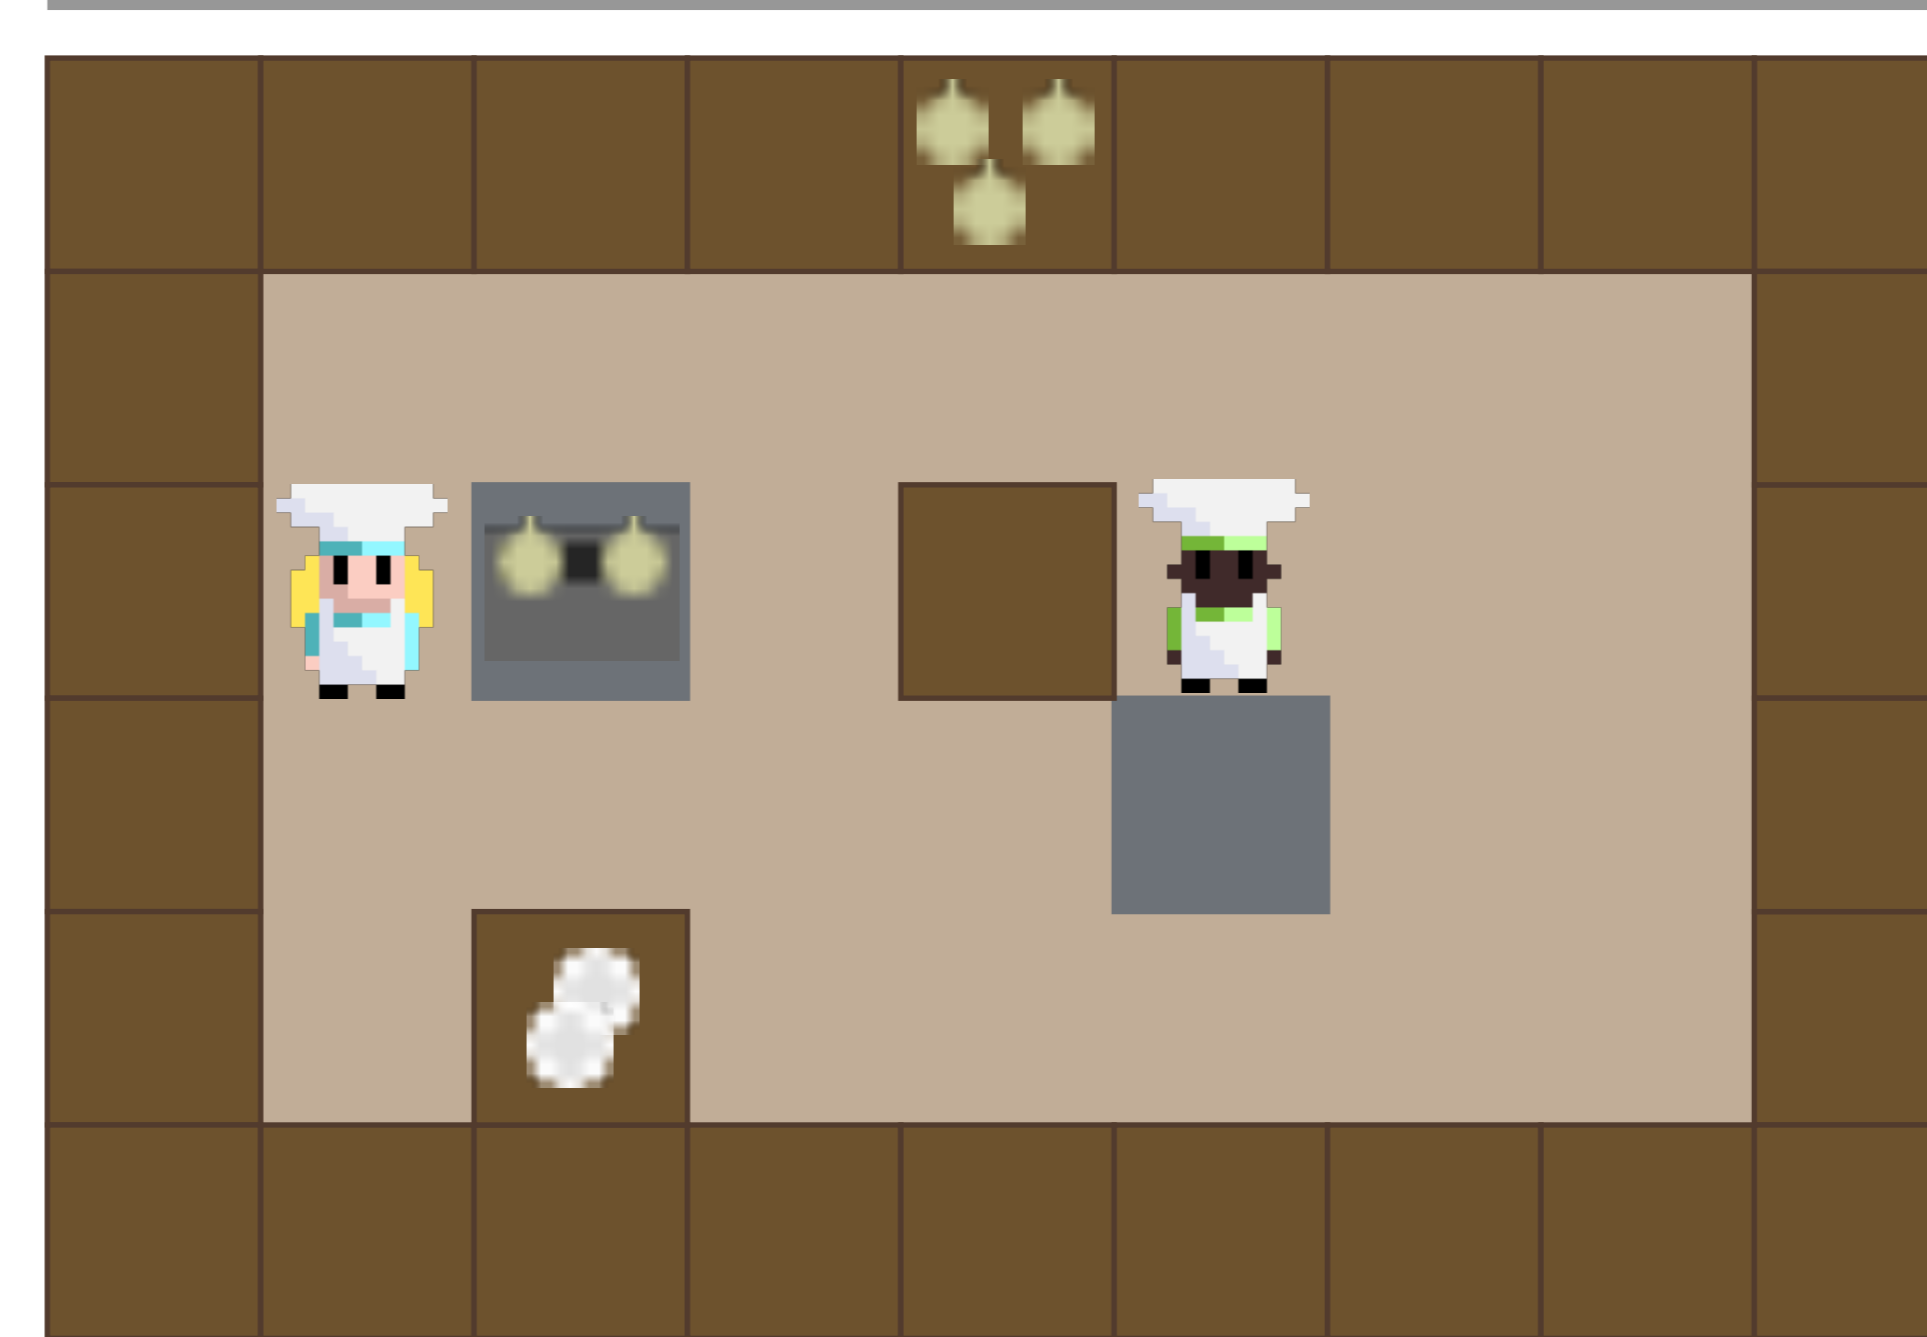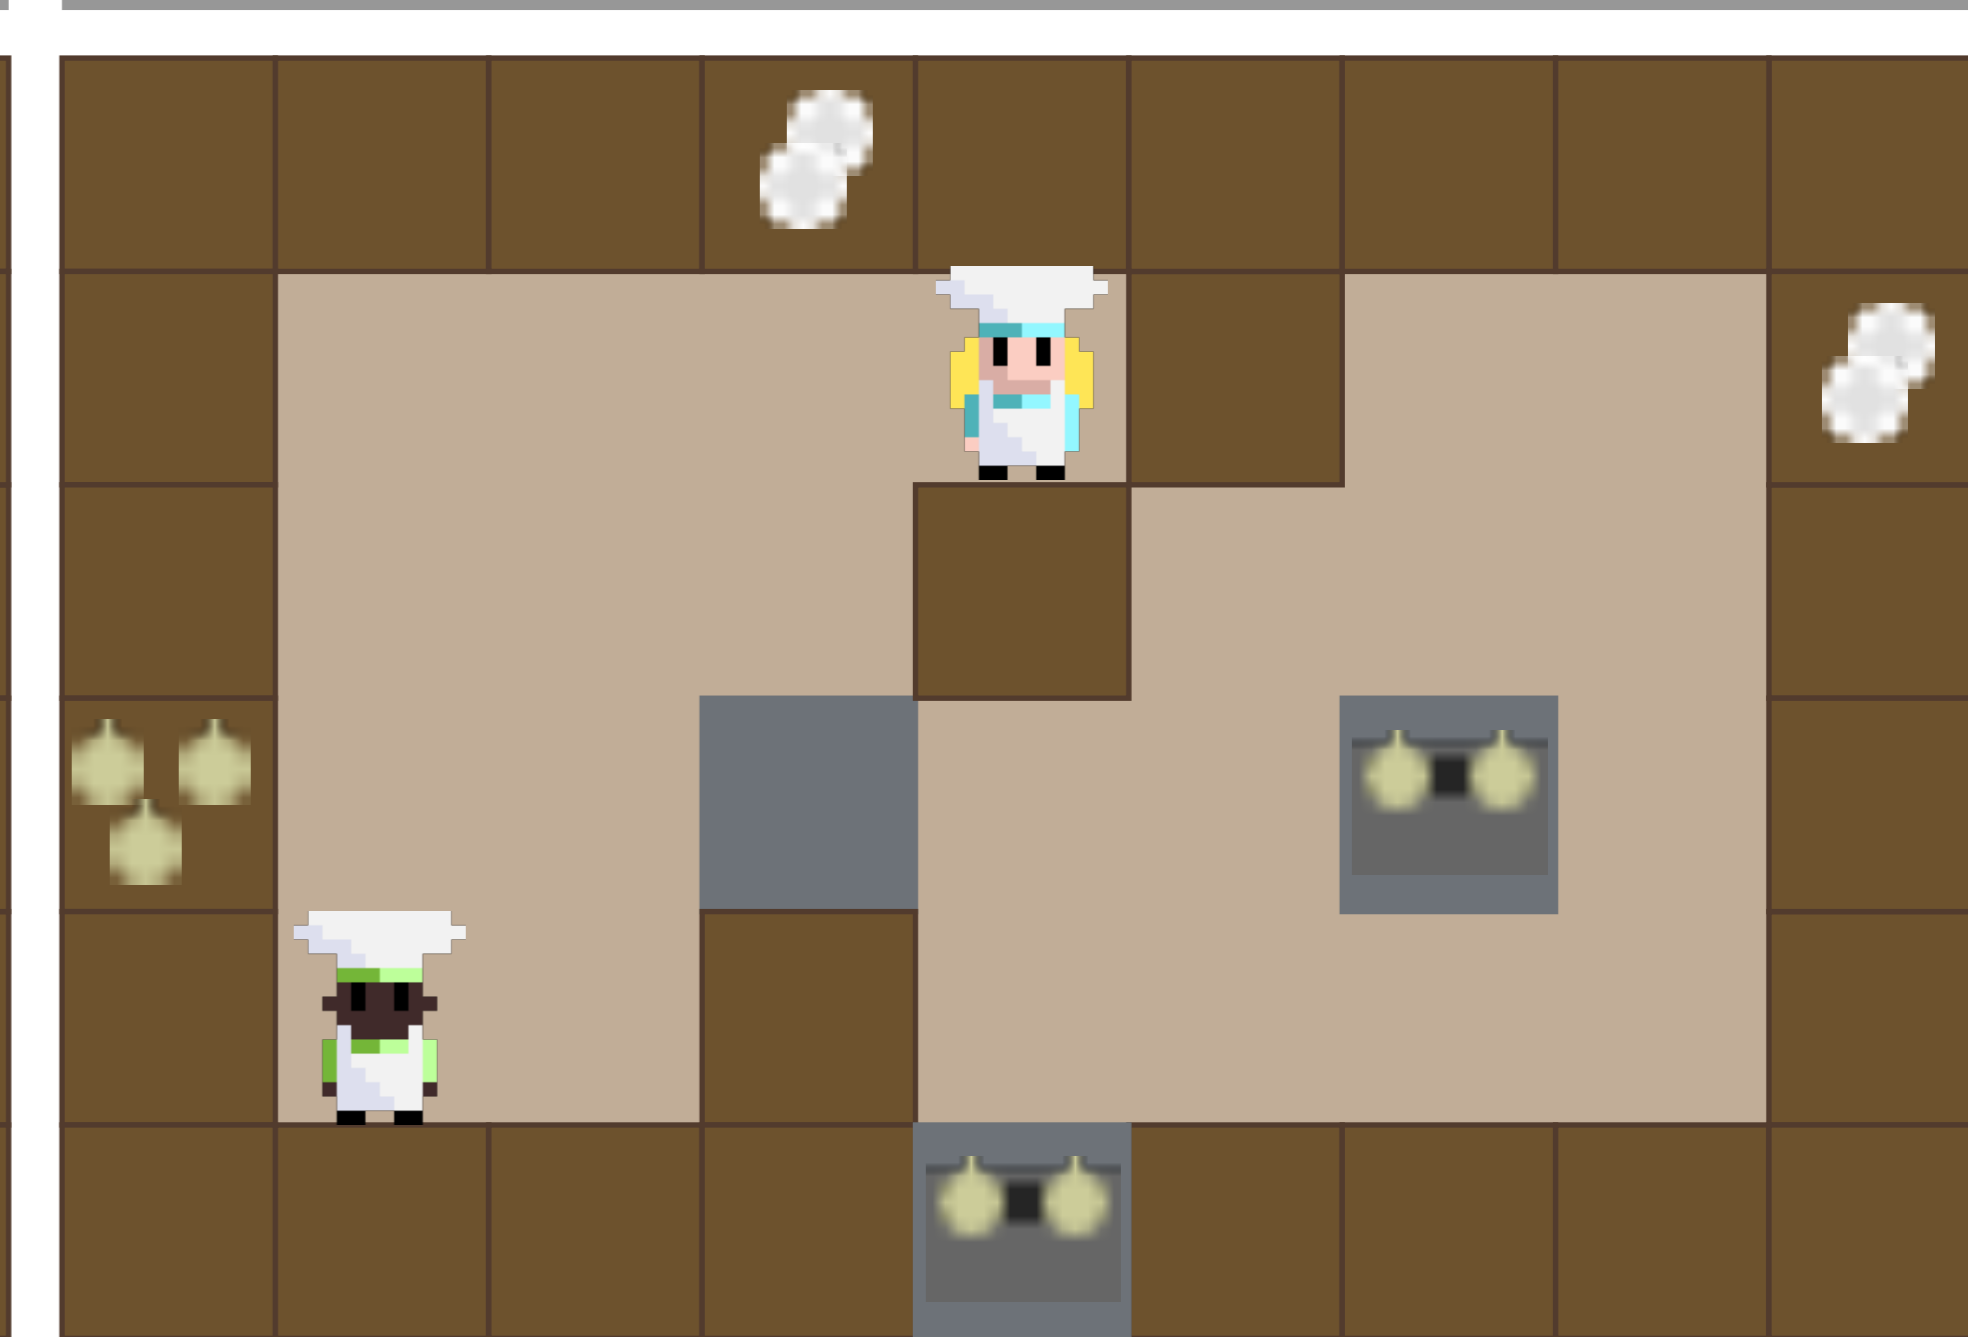**End**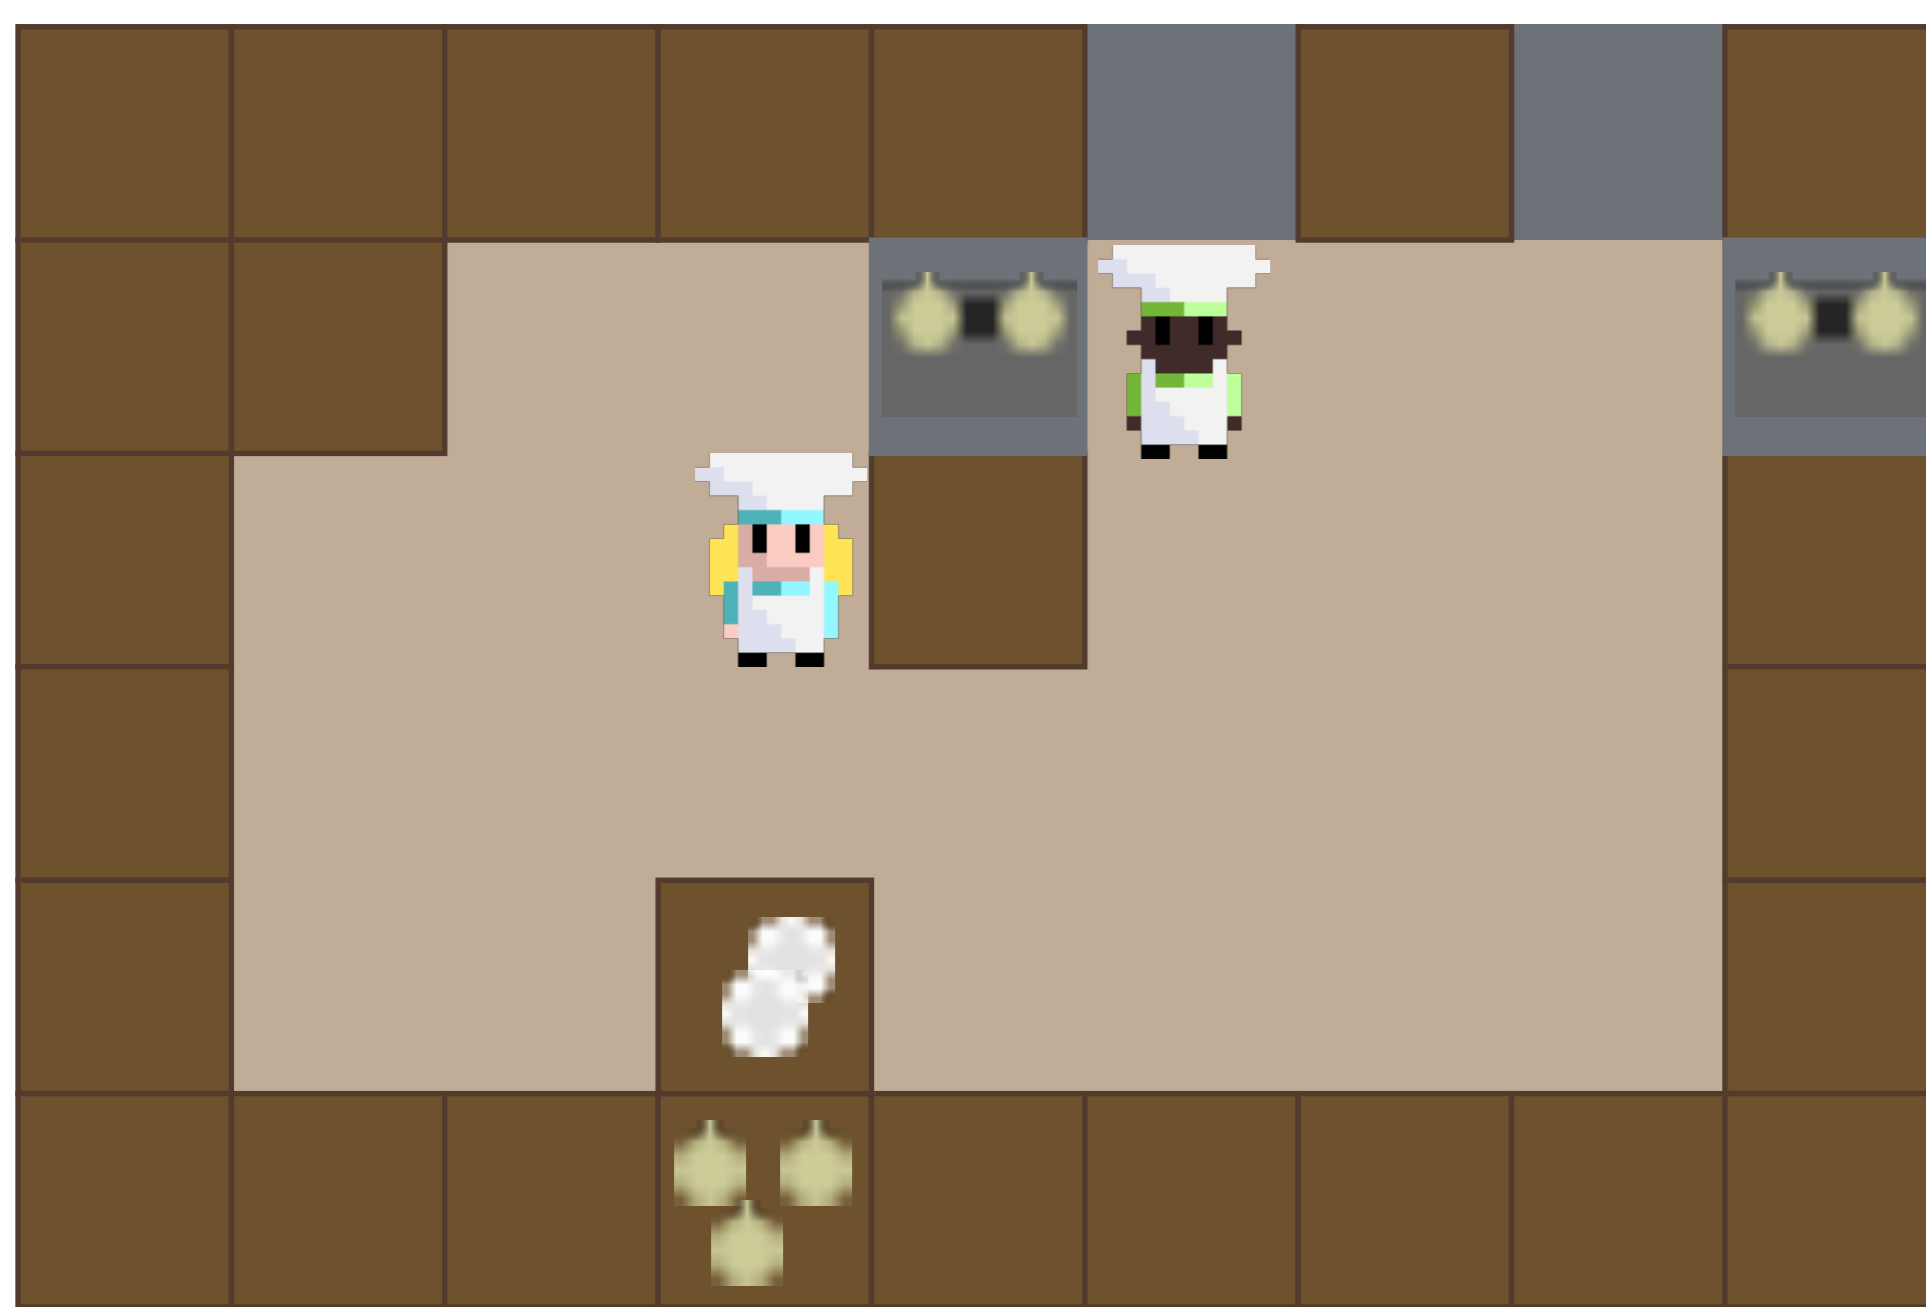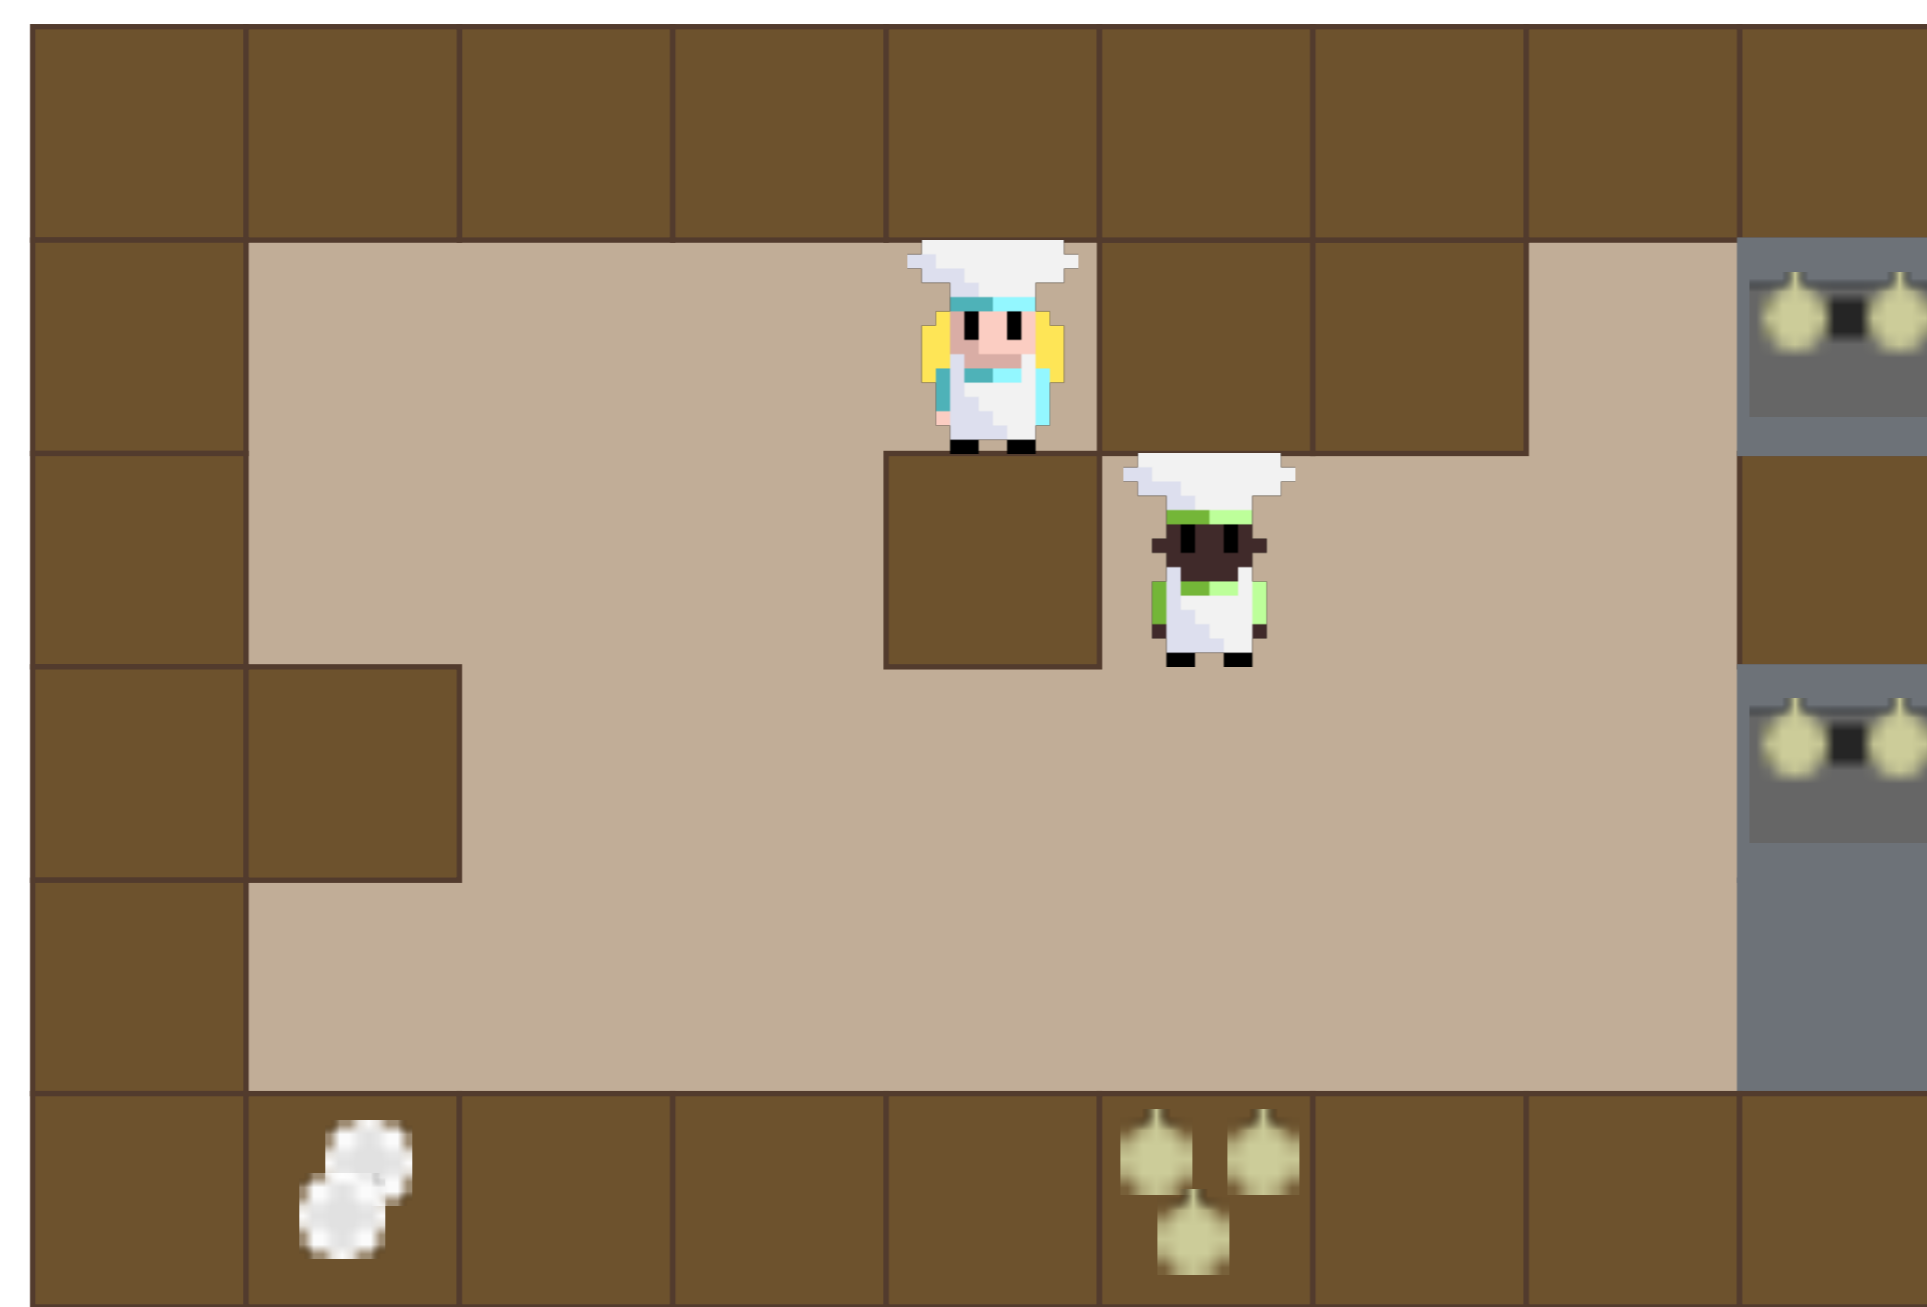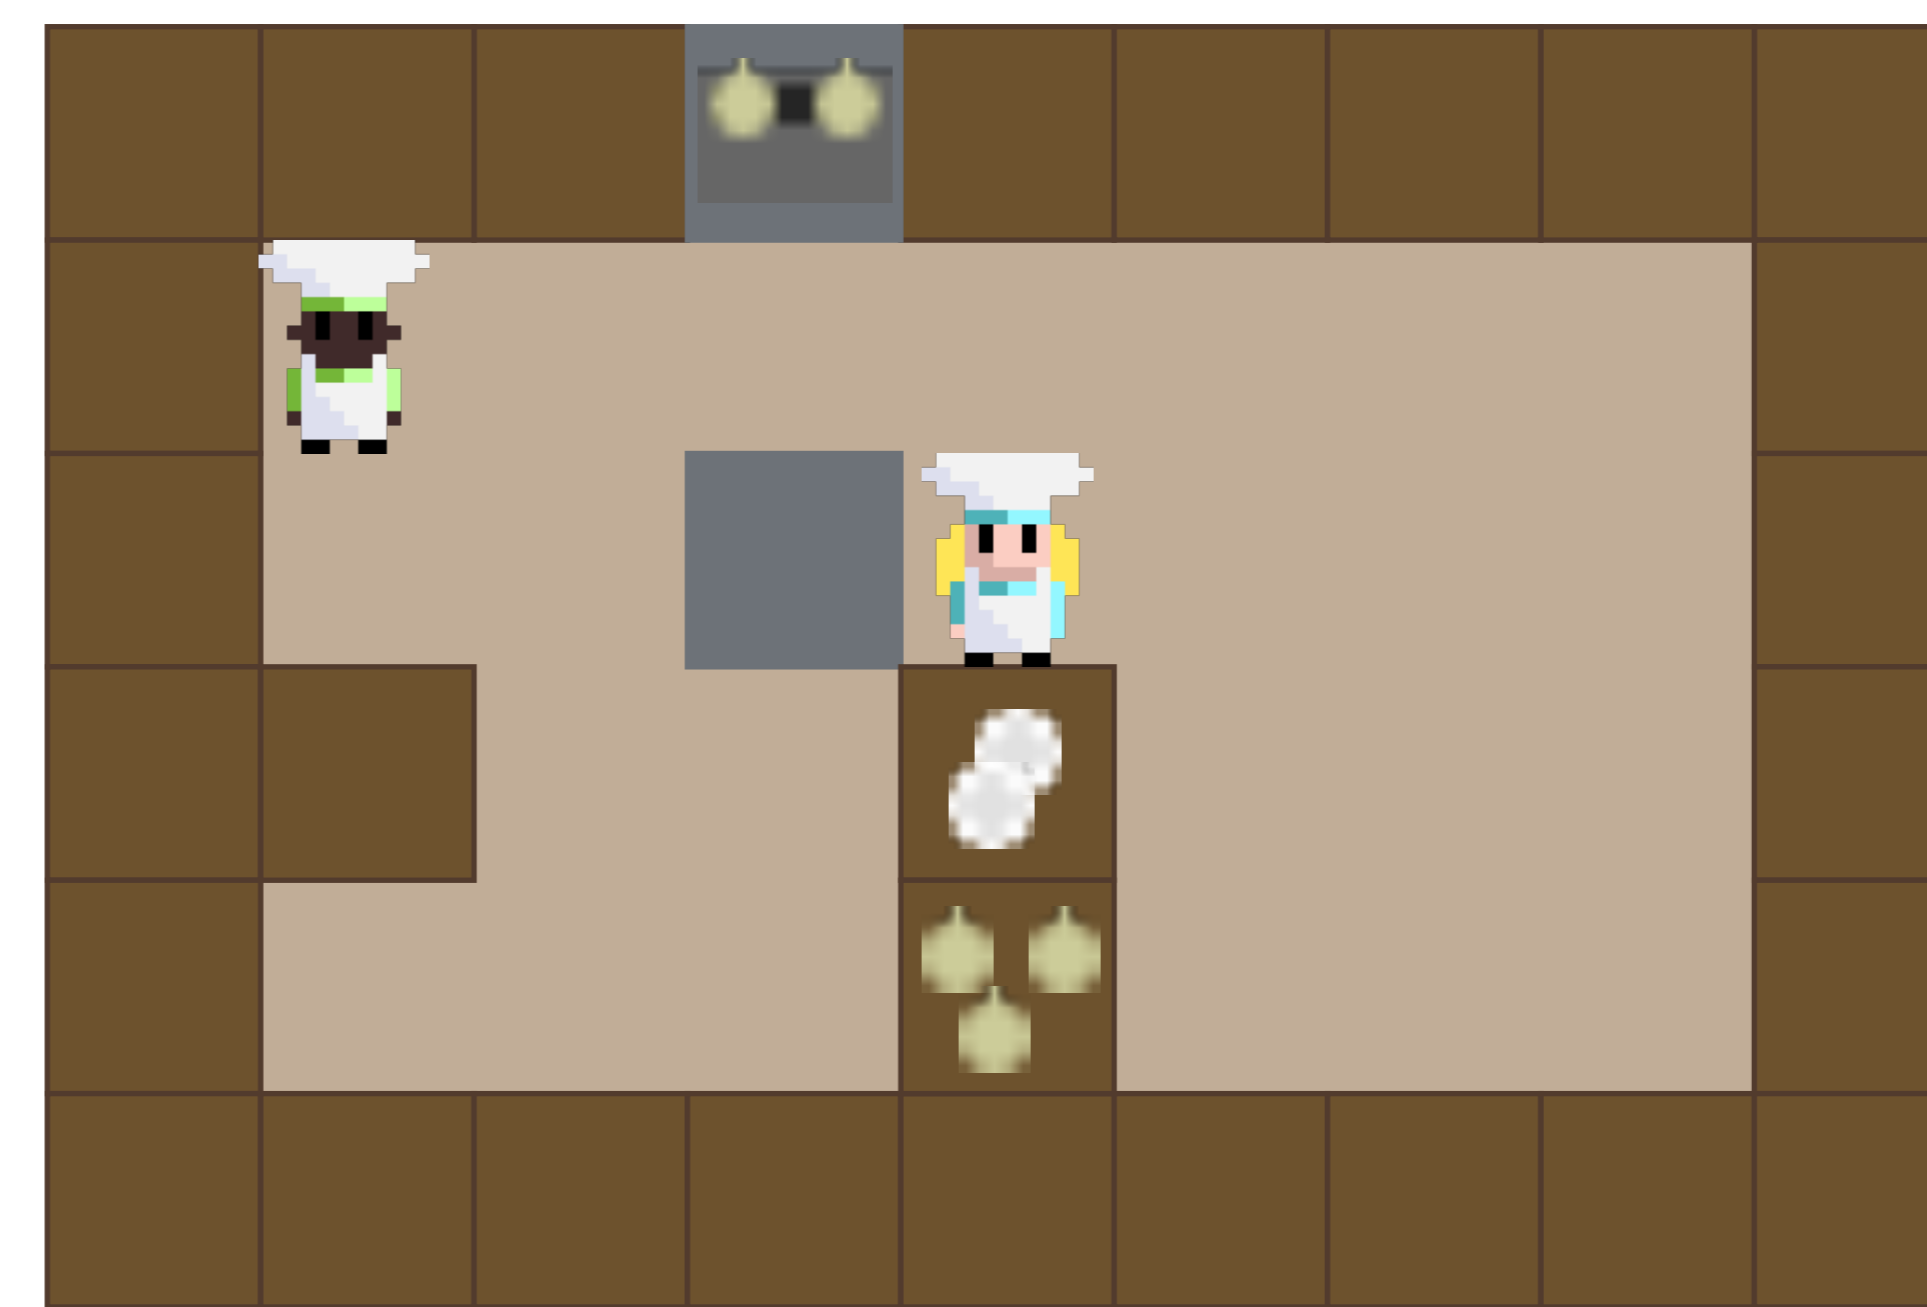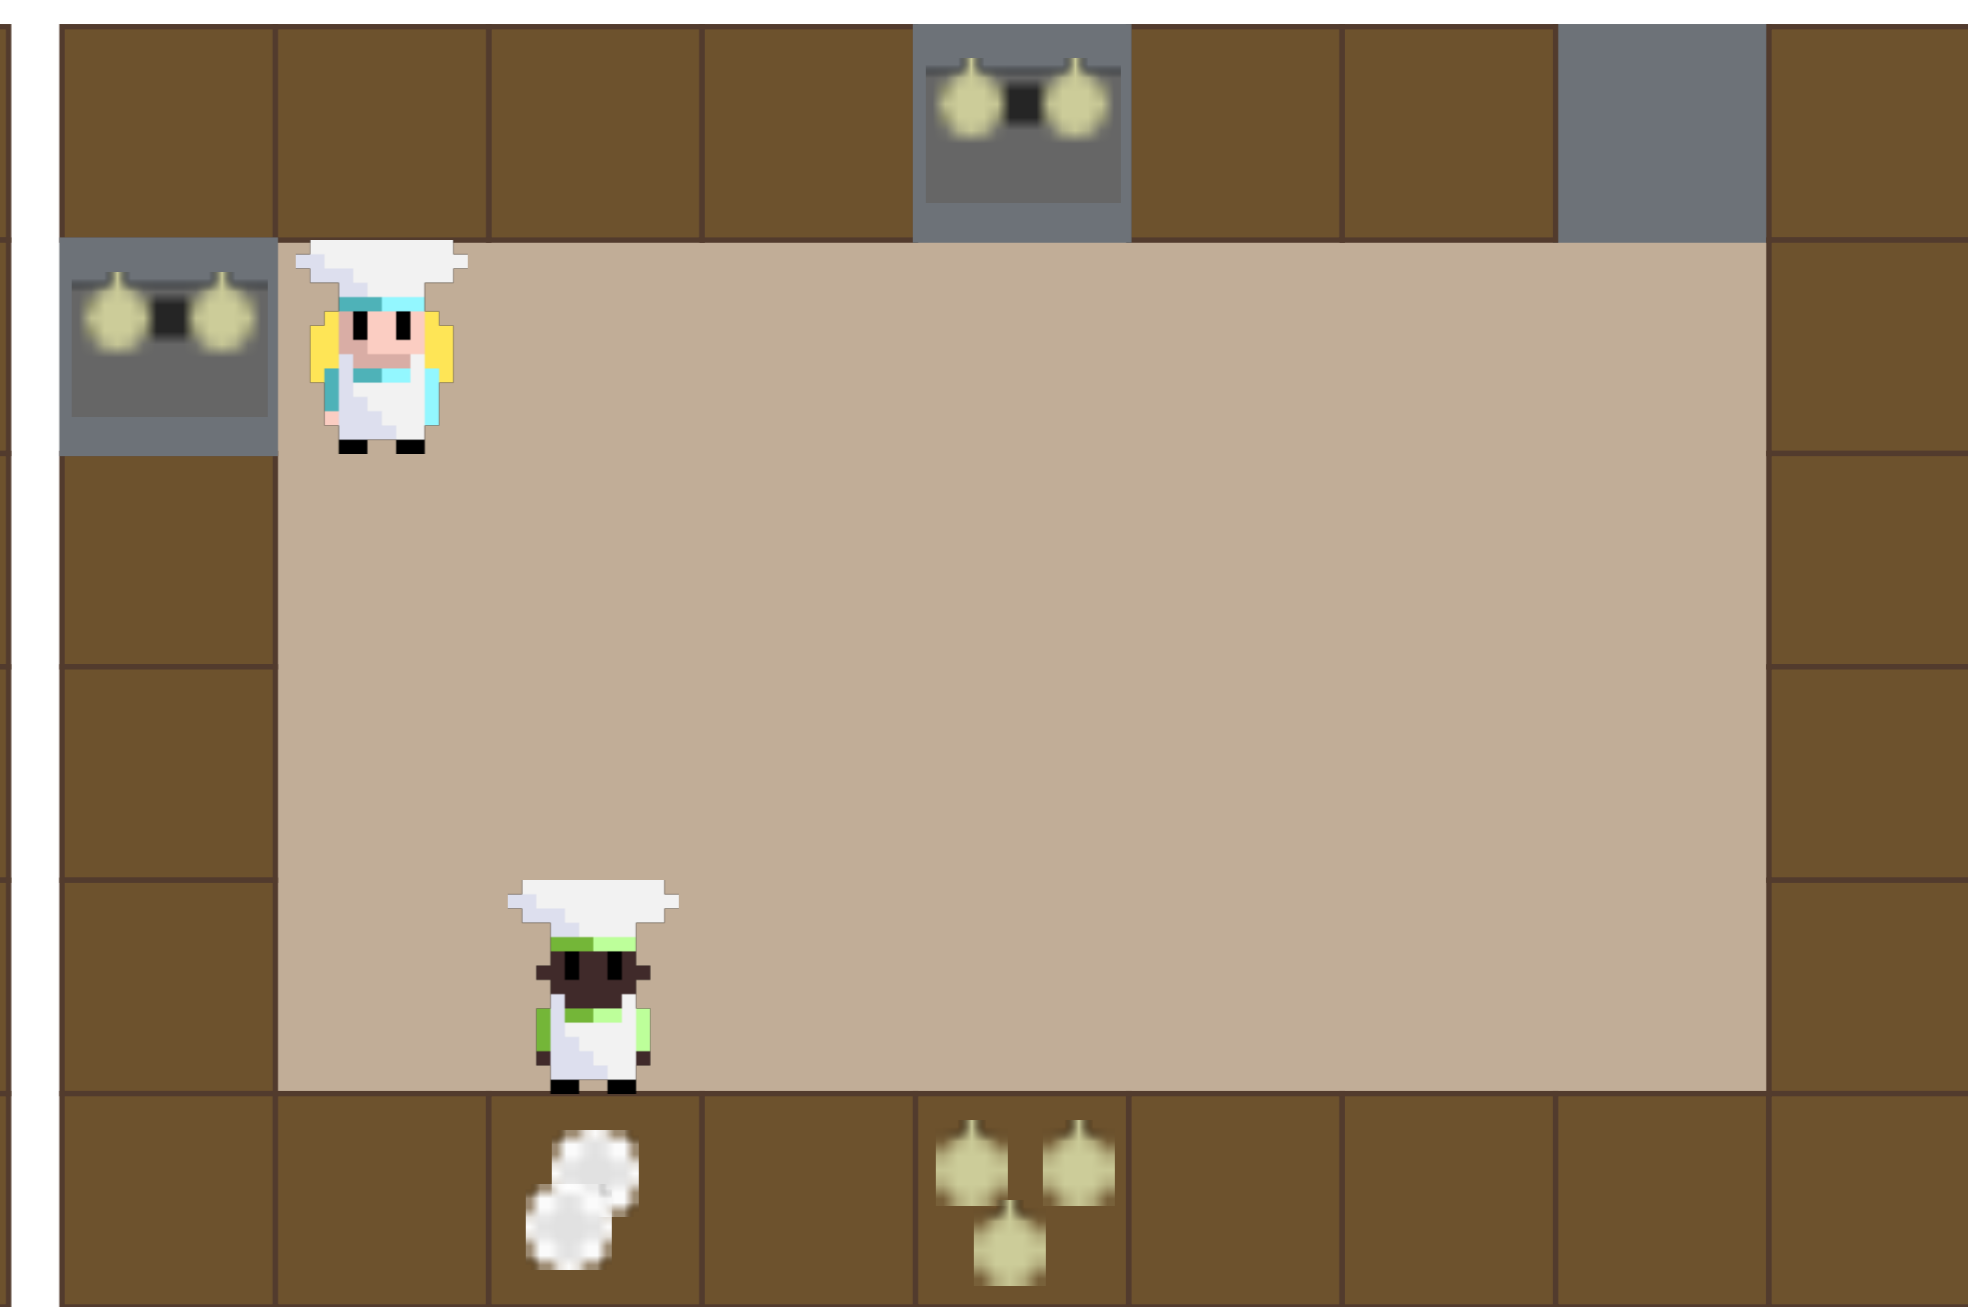

Supplement: supplementary_material [file attachment]
